# Supplementary material
Source: Springer Nature journal article supplement (https://www.springermedizin.de/resource/supplementary/12891_2008_578_MOESM3_ESM.pdf/9511376)
Supplement: MOESM3 [file 9511376]

**a. Subacute patients.**

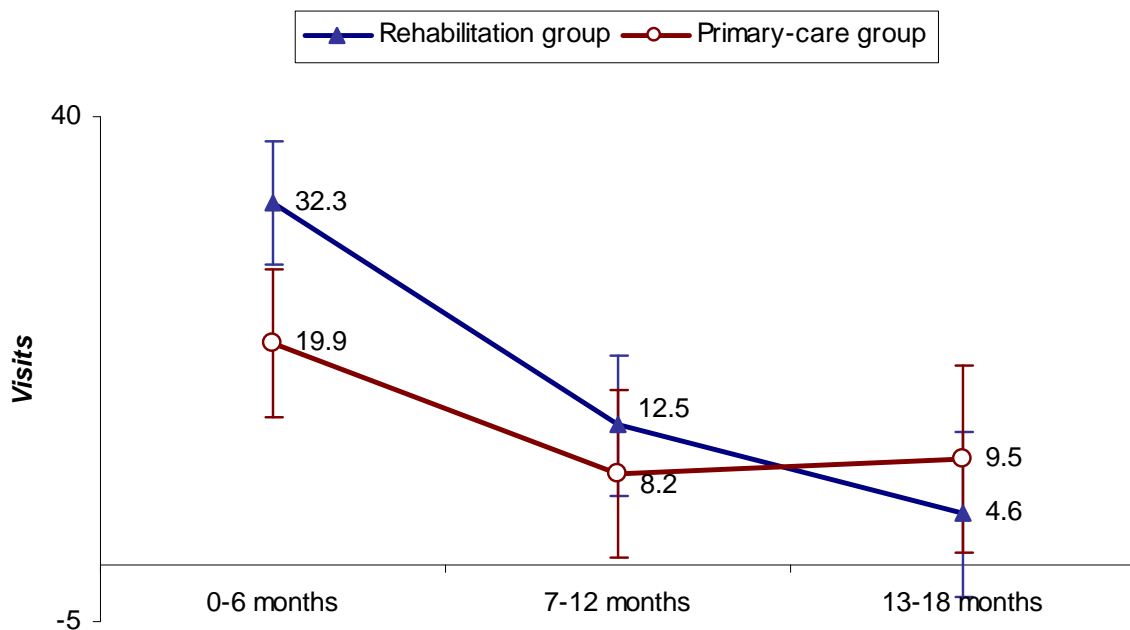

**b. Chronic patients.**

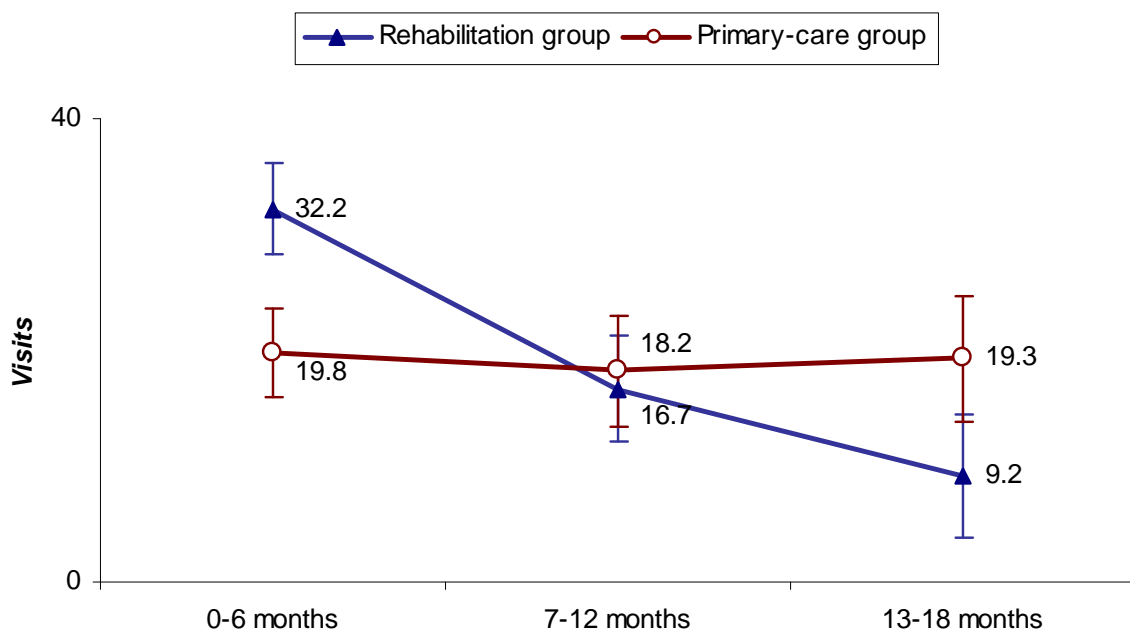

Time (first, second or third six-month period):  $p < .001$ .

Rehabilitation group or primary-care group: NS.

Subacute or chronic: NS.

Time x rehabilitation group or primary-care group:  $p < .001$ .

Time x rehabilitation group or primary-care group x subacute or chronic: NS.
